# Supplementary material
Source: PubMed Central journal article supplement (PMC8660939)
Supplement: NIHMS1752248-supplement-1.pdf [file NIHMS1752248-supplement-1.pdf]

## **SUPPLEMENTARY MATERIALS**

**Supplementary Table 1. Baseline variables for all the survivors who had follow-up data\***

| Variable                                  | Total population<br>N=243 | Hypo-inflammatory<br>N=173 | Hyper-inflammatory<br>N=70 | P value‡ |
|-------------------------------------------|---------------------------|----------------------------|----------------------------|----------|
| <b>Baseline patient data</b>              |                           |                            |                            |          |
| Age, years                                | 52 (41,60)                | 52 (40,60)                 | 52 (43,61)                 | 0.55     |
| Female, N (%)                             | 130 (53)                  | 90 (52)                    | 40 (57)                    | 0.48     |
| White, N (%)                              | 204 (84)                  | 147 (85)                   | 57 (81)                    | 0.43     |
| Diabetes, N (%)                           | 55 (23)                   | 31 (18)                    | 24 (34)                    | 0.01     |
| BMI, kg/m <sup>2</sup>                    | 30 (26,37)                | 29 (25,37)                 | 31 (26,36)                 | 0.71     |
| Living at home independently,<br>N (%)    | 214 (88)                  | 153 (88)                   | 61 (87)                    | 0.83     |
| <b>Baseline intensive care data</b>       |                           |                            |                            |          |
| Medical ICU, N (%)                        | 143 (59)                  | 104 (60)                   | 39 (56)                    | 0.57     |
| APACHE III                                | 85 (68,106)               | 78 (61,94)                 | 108 (87,125)               | <0.01    |
| PaO <sub>2</sub> :FiO <sub>2</sub>        | 153 (115,202)             | 152 (113,202)              | 154 (130,205)              | 0.54     |
| Shock at baseline, N (%)                  | 98 (40)                   | 53 (31)                    | 45 (64)                    | <0.01    |
| Primary lung injury risk factor, N (%)    |                           |                            |                            | 0.13§    |
| Pneumonia                                 | 174 (72)                  | 129 (75)                   | 45 (64)                    |          |
| Non-pulmonary infection                   | 49 (20)                   | 29 (17)                    | 20 (29)                    |          |
| Aspiration                                | 15 (6)                    | 12 (7)                     | 3 (4)                      |          |
| Trauma                                    | 2 (1)                     | 2 (1)                      | 0 (0)                      |          |
| <b>Organ-failure-free days to day 14¶</b> |                           |                            |                            |          |
| Cardiovascular                            | 12 (9,13)                 | 12 (10,13)                 | 10 (6,12)                  | <0.01    |
| Coagulation                               | 14 (14,14)                | 14 (14,14)                 | 14 (10,14)                 | <0.01    |
| Liver                                     | 14 (14,14)                | 14 (14,14)                 | 14 (5,14)                  | <0.01    |
| Renal                                     | 14 (14,14)                | 14 (14,14)                 | 14 (5,14)                  | <0.01    |
| Ventilator-free days to day 28**          | 23 (18,25)                | 24 (20,26)                 | 20 (15,23)                 | <0.01    |
| ICU LOS, days                             | 10 (7,16)                 | 9 (7,14)                   | 14 (9,19)                  | <0.01    |
| Hospital LOS, days                        | 16 (11,26)                | 15 (10,22)                 | 22 (14,34)                 | <0.01    |

APACHE, Acute Physiology and Chronic Health Evaluation; BMI, body mass index; FiO<sub>2</sub>, fraction of inspired oxygen; ICU, intensive care unit; LOS, length of stay; PaO<sub>2</sub>, partial pressure of arterial oxygen.

\*Median values (IQR) are presented unless otherwise indicated.

‡Wilcoxon rank-sum test was used for continuous variables and Fisher's exact test for proportions, unless stated otherwise.

§Chi-square test.

¶In this cohort of survivors, these variables represent the number of days without organ/system failure (as defined herein) during the first 14 days after randomization. Organs/systems were considered failure-free after patients were discharged from the hospital. Cardiovascular failure was defined as a systolic blood pressure ≤ 90 mmHg or use of vasopressor; coagulation failure defined as platelet count ≤ 80,000 per cubic millimeter; liver failure defined as serum bilirubin level of ≥ 2.0 mg per deciliter (34 μmol per liter); renal failure defined as serum creatinine ≥ 2.0 mg per deciliter (180 μmol per liter).

\*\* In this cohort of survivors, this variable represents the number of days without ventilator assistance during the first 28 days after randomization.

**Supplementary Table 2. Comparison of changes between 6 and 12 months\***

| Patient-reported outcome domain-survey instrument†                 | Hypo-inflammatory<br>N=160 | Hyper-inflammatory<br>N=59 | P<br>Value‡ |
|--------------------------------------------------------------------|----------------------------|----------------------------|-------------|
| <b>Mortality between 6 and 12 months**</b>                         | 5 (3%)                     | 4 (6%)                     | 0.28        |
| <b>Health-related quality of life: SF-36 (normalized scores)</b>   |                            |                            |             |
| Physical Functioning                                               | 0.0 (-4.2,4.2)             | 2.1 (0.0,6.3)              | 0.01        |
| Physical Component Summary                                         | 1.6 (-4.8,6.3)             | 2.2 (-3.0,8.0)             | 0.26        |
| Mental Health                                                      | 0.0 (-8.4,5.6)             | 0.0 (-2.8,5.6)             | 0.08        |
| Mental Component Summary                                           | -1.2 (-7.2,5.2)            | 2.5 (-2.1,9.5)             | 0.01        |
| <b>Health-related quality of life: EQ-5D-3L</b>                    |                            |                            |             |
| Utility score                                                      | 0.0 (-0.1,0.1)             | 0.0 (0.0,0.1)              | 0.22        |
| Visual analogue scale                                              | 5.0 (-10.0,15.0)           | 1.0 (-6.0,13.0)            | 0.97        |
| <b>Physical functioning</b>                                        |                            |                            |             |
| Functional Performance Inventory-Short Form                        | 0.0 (-0.2,0.2)             | 0.2 (0.0,0.5)              | 0.01        |
| <b>Mental health symptoms</b>                                      |                            |                            |             |
| Anxiety subscale of HADS                                           | 0.0 (-2.0,2.0)             | -1.0 (-3.8,0.0)            | 0.01        |
| Depression subscale of HADS                                        | 0.0 (-1.0,2.0)             | 0.0 (-3.5,1.0)             | 0.03        |
| Post-traumatic stress disorder: IES-R                              | 0.0 (-0.2,0.3)             | -0.1 (-0.6,0.1)            | 0.01        |
| <b>Performance-based physical outcomes</b>                         | <b>N=37</b>                | <b>N=16</b>                |             |
| 6-Minute walk distance, % predicted                                | 4 (-1,14)                  | 8 (1,16)                   | 0.59        |
| 4 m gait speed, m/s                                                | 0.0 (0.0,0.1)              | 0.0 (0.0,0.2)              | 0.71        |
| Hand grip, % predicted§                                            | 7 (-1,18)                  | 5 (-4,10)                  | 0.23        |
| Muscle strength, % maximum                                         | 0 (-2,3)                   | 2 (-2,7)                   | 0.39        |
| Maximal inspiratory pressure, % predicted                          | 6 (-1,17)                  | 11 (4,32)                  | 0.16        |
| FEV <sub>1</sub> % predicted                                       | 1 (-3,6)                   | 0 (-5,3)                   | 0.52        |
| FVC % predicted                                                    | 1 (-4,4)                   | -1 (-3,3)                  | 0.65        |
| <b>Cognitive function (for all tests, higher score is better)¥</b> | <b>N=101</b>               | <b>N=40</b>                |             |
| Executive function                                                 | 0.0 (0.0,1.0)              | 1.0 (0.0,2.2)              | 0.29        |
| Language                                                           | 0.5 (-2.2,5.2)             | 1.0 (-3.5,4.0)             | 0.94        |
| Verbal reasoning and concept formation                             | 0.5 (-1.0,2.0)             | 1.0 (0.0,2.0)              | 0.68        |
| Working memory and attention                                       | 0.0 (-1.2,1.0)             | 0.0 (-1.0,1.5)             | 0.41        |
| Immediate memory                                                   | 0.0 (-1.2,2.0)             | 1.0 (-1.0,2.0)             | 0.62        |
| Delayed memory                                                     | 0.0 (-1.0,2.0)             | 1.0 (-1.0,2.0)             | 0.55        |

FEV<sub>1</sub>, forced expiratory volume first second; FPI-Short Form overall score and subscale scores (for each, range: 0–3; higher score is better); FVC, forced vital capacity; HADS, Hospital Anxiety and Depression Scale; ICU, intensive care unit; IES-R, Impact of Event Scale-revised; SF-36, Medical Outcomes Study Short Form 36 V.2.

\*Includes patients who completed both 6- and 12-month assessments. Median values (IQR) are presented unless otherwise indicated.

\*\* Five out of 166 and 4 out of 67 patients who completed 6-month assessment died prior to 12-month assessment in the hypo- and hyper-inflammatory subphenotypes, respectively.

‡Wilcoxon rank-sum test was used for continuous variables and Fisher’s exact test for proportions

†Explanation of scoring: SF-36 physical function and mental health normalized scores (mean=50; SD =10; range: 0–100; higher score is better); SF-36 physical and mental health summary normalized scores (mean=50; SD=10; higher score is better); EQ-5D utility score (range: –0.11 to 1.0; higher score is better) and visual analogue scale score (range: 0–100; higher score is better); FPI-Short Form overall score and subscale scores (for each, range: 0–3; higher score is better); HADS subscale scores for anxiety and depression (for each, range: 0–21; lower score is better, with scores ≥8 indicating substantial symptoms); IES-R (range: 0–4; lower score is better, with scores ≥1.6 indicating substantial symptoms); manual muscle testing score (range: 0–60; higher score is better, with scores <48 indicating ‘ICU-acquired weakness’).

§Greater handgrip of right and left hands.

¥Explanation of scoring: executive function was evaluated with the Hayling Sentence Completion Test scaled score (range 1–10); language was evaluated with the Controlled oral word association total score; verbal reasoning and concept formation was evaluated with the Similarities age-adjusted scaled score (range 1–19); attention and working memory was evaluated with the Digit Span age-adjusted scaled score (range 1–19); and immediate and delayed memory was evaluated with the Logical Memory I and II age-adjusted scaled scores (range 1–19).

**Supplementary Table 3. 6-month comparison, by treatment group**

| Patient-reported outcome domain-survey instrument                | Placebo Group    |                        |                         |         | Rosuvastatin Group |                        |                         |         |
|------------------------------------------------------------------|------------------|------------------------|-------------------------|---------|--------------------|------------------------|-------------------------|---------|
|                                                                  | Total N=124      | Hypo-inflammatory N=85 | Hyper-inflammatory N=39 | P Value | Total N=108        | Hypo-inflammatory N=80 | Hyper-inflammatory N=28 | P Value |
| <b>Health-related quality of life: SF-36 (normalized scores)</b> |                  |                        |                         |         |                    |                        |                         |         |
| Physical Functioning                                             | 32 (23-47)       | 32 (23-49)             | 32 (22-47)              | 0.57    | 37 (23-49)         | 38 (23-49)             | 34 (19-40)              | 0.10    |
| Physical Component Summary                                       | 34 (28-46)       | 36 (27-47)             | 33 (30-41)              | 0.45    | 36 (28-49)         | 37 (28-49)             | 35 (27-47)              | 0.52    |
| Mental Health                                                    | 47 (35-58)       | 47 (34-58)             | 50 (39-58)              | 0.85    | 42 (33-53)         | 44 (30-53)             | 42 (33-50)              | 0.67    |
| Mental Component Summary                                         | 50 (37-58)       | 50 (37-58)             | 50 (38-56)              | 0.92    | 44 (32-56)         | 47 (32-56)             | 39 (33-47)              | 0.31    |
| <b>Health-related quality of life: EQ-5D-3L</b>                  |                  |                        |                         |         |                    |                        |                         |         |
| Utility score                                                    | 0.78 (0.47-0.83) | 0.78 (0.49-0.83)       | 0.71 (0.45-0.83)        | 0.67    | 0.77 (0.58-0.84)   | 0.80 (0.60-0.84)       | 0.73 (0.49-0.84)        | 0.32    |
| Visual analogue scale                                            | 70 (50-80)       | 65 (50-80)             | 75 (48-87)              | 0.77    | 75 (60-82)         | 75 (60-85)             | 72 (52-80)              | 0.55    |
| <b>Physical functioning</b>                                      |                  |                        |                         |         |                    |                        |                         |         |
| Functional Performance Inventory-Short Form                      | 2.0 (1.4-2.5)    | 2.0 (1.4-2.6)          | 1.9 (1.3-2.5)           | 0.73    | 1.9 (1.3-2.5)      | 2.0 (1.3-2.6)          | 1.6 (1.1-2.3)           | 0.06    |
| <b>Mental health symptoms</b>                                    |                  |                        |                         |         |                    |                        |                         |         |
| Anxiety subscale of HADS                                         | 6 (3-10)         | 5 (2-10)               | 8 (4-11)                | 0.14    | 7 (3-11)           | 7 (3-11)               | 8 (5-13)                | 0.49    |
| Depression subscale of HADS                                      | 5 (2-10)         | 5 (2-9)                | 5 (2-11)                | 0.73    | 6 (2-10)           | 6 (2-10)               | 5 (3-10)                | 1.00    |
| Post-traumatic stress disorder score- IES-R                      | 0.7 (0.2-1.6)    | 0.6 (0.1-1.5)          | 1.0 (0.2-1.9)           | 0.18    | 1.0 (0.3-1.7)      | 0.9 (0.3-1.5)          | 1.3 (0.4-1.9)           | 0.30    |
| <b>In-patient healthcare utilization</b>                         |                  |                        |                         |         |                    |                        |                         |         |
| Physical rehabilitation, N (%) †                                 | 29 (23)          | 16 (19)                | 13 (33)                 | 0.11    | 22 (20)            | 17 (21)                | 5 (18)                  | 1.00    |
| Skilled nursing, N (%) †                                         | 8 (6)            | 3 (4)                  | 5 (13)                  | 0.11    | 10 (9)             | 7 (9)                  | 3 (11)                  | 0.71    |
| Hospital re-admission, N (%)                                     | 35 (28)          | 23 (27)                | 12 (31)                 | 0.67    | 33 (31)            | 26 (32)                | 7 (25)                  | 0.63    |
| No. admissions to hospital, among those with admission           | 1.0 (1.0-3.0)    | 1.0 (1.0-2.5)          | 1.0 (1.0-3.0)           | 1.00    | 1.0 (1.0-2.0)      | 1.0 (1.0-2.0)          | 1.0 (1.0-2.5)           | 0.61    |

**Supplementary Table 3, cont'd**

| Performance-based physical outcomes       | Placebo Group |                               |                                |             | Rosuvastatin Group |                               |                               |            |
|-------------------------------------------|---------------|-------------------------------|--------------------------------|-------------|--------------------|-------------------------------|-------------------------------|------------|
|                                           | Total<br>N=37 | Hypo-<br>inflammatory<br>N=25 | Hyper-<br>inflammatory<br>N=12 | P<br>Value‡ | Total<br>N=28      | Hypo-<br>inflammatory<br>N=19 | Hyper-<br>inflammatory<br>N=9 | P<br>Value |
| 6-Minute walk distance, % predicted       | 66 (48-80)    | 66 (49-80)                    | 68 (43-82)                     | 0.96        | 66 (49-79)         | 66 (46-77)                    | 65 (56-79)                    | 0.62       |
| 4 m gait speed, m/s                       | 0.9 (0.8-1.2) | 0.9 (0.8-1.2)                 | 0.9 (0.7-1.1)                  | 0.45        | 0.9 (0.8-1.0)      | 0.9 (0.8-1.0)                 | 0.9 (0.8-0.9)                 | 0.66       |
| Hand Grip, Greater % predicted            | 82 (68-101)   | 91 (70-101)                   | 77 (59-90)                     | 0.25        | 77 (58-111)        | 76 (48-118)                   | 82 (63-88)                    | 0.81       |
| Muscle strength, % maximum                | 95 (92-100)   | 95 (93-100)                   | 92 (88-95)                     | 0.04        | 96 (92-98)         | 97 (91-98)                    | 95 (93-100)                   | 0.47       |
| Maximal Inspiratory Pressure, % predicted | 83 (60-110)   | 92 (66-114)                   | 72 (58-99)                     | 0.16        | 93 (54-110)        | 93 (56-111)                   | 94 (55-107)                   | 0.77       |
| FEV <sub>1</sub> % predicted              | 78 (60-90)    | 85 (63-95)                    | 73 (52-84)                     | 0.24        | 80 (68-92)         | 76 (67-88)                    | 88 (74-96)                    | 0.33       |
| FVC % predicted                           | 77 (61-94)    | 80 (63-97)                    | 70 (58-80)                     | 0.21        | 78 (64-92)         | 72 (63-93)                    | 87 (75-91)                    | 0.69       |
| <b>Cognitive function status</b>          | <b>N=76</b>   | <b>N=50</b>                   | <b>N=26</b>                    |             | <b>N=51</b>        | <b>N=39</b>                   | <b>N=12</b>                   |            |
| Executive function                        | 5 (3-6)       | 5 (3-6)                       | 6 (3-6)                        | 0.57        | 5 (4-6)            | 5 (4-6)                       | 4 (2-6)                       | 0.16       |
| Language                                  | 33 (24-39)    | 33 (23-39)                    | 35 (24-40)                     | 0.78        | 30 (23-40)         | 32 (25-41)                    | 25 (17-31)                    | 0.10       |
| Verbal reasoning and concept formation    | 11(7-12)      | 10 (7-11)                     | 11 (9-12)                      | 0.16        | 10 (7-12)          | 10 (7-13)                     | 8 (6-10)                      | 0.05       |
| Working memory and attention              | 10 (8-11)     | 10 (8-11)                     | 10 (8-11)                      | 0.79        | 9 (7-12)           | 9 (8-12)                      | 8 (6.0-12.0)                  | 0.16       |
| Immediate memory                          | 9 (6-11)      | 9 (6-11)                      | 10 (6-12)                      | 0.51        | 9 (6-12)           | 9 (7-12)                      | 6 (5-8)                       | 0.01       |
| Delayed memory                            | 9 (7-11)      | 8 (7-11)                      | 9 (7-12)                       | 0.39        | 8 (6-11)           | 9 (7-11)                      | 6 (5-7)                       | <0.01      |

COWA, controlled oral word association; EQ-5D-3L, EuroQol- 5 dimensions- 3 levels; FEV<sub>1</sub>, forced expiratory volume first second; FVC, forced vital capacity; HADS, Hospital Anxiety and Depression Scale; ICU, intensive care unit; IES-R, Impact of Event Scale-revised; NCSE, neurobehavioral cognitive status examination; SF-36, Medical Outcomes Study Short Form 36 V.2.

\*Median values (IQR) are presented unless otherwise indicated. Higher scores are better, except for mental health outcomes.

‡Wilcoxon rank-sum test was used for continuous variables and Fisher's exact test for proportions.

\*Normed using population mean of 50 and SD of 10.

¶Includes number of patients discharged from hospital to these facilities or admitted to these facilities in the course of follow-up

**Supplementary Table 4. 12-month outcomes, by treatment group\***

| Patient-reported outcome domain-survey instrument                | Placebo Group    |                           |                            |         | Rosuvastatin Group |                           |                            |         |
|------------------------------------------------------------------|------------------|---------------------------|----------------------------|---------|--------------------|---------------------------|----------------------------|---------|
|                                                                  | Total<br>N=115   | Hypo-inflammatory<br>N=80 | Hyper-inflammatory<br>N=35 | P Value | Total<br>N=104     | Hypo-inflammatory<br>N=80 | Hyper-inflammatory<br>N=24 | P Value |
| <b>Health-related quality of life: SF-36 (normalized scores)</b> |                  |                           |                            |         |                    |                           |                            |         |
| Physical Functioning                                             | 36 (25-51)       | 34 (23-49)                | 38 (28-53)                 | 0.30    | 37 (25-51)         | 38 (23-51)                | 36 (28-44)                 | 0.86    |
| Physical Component Summary                                       | 37 (27-50)       | 35 (26-48)                | 40 (30-51)                 | 0.25    | 39 (30-51)         | 40 (30-52)                | 39 (33-45)                 | 0.59    |
| Mental Health                                                    | 50 (36-56)       | 44 (33-56)                | 53 (44-58)                 | 0.07    | 42 (30-58)         | 39 (30-58)                | 51 (36-56)                 | 0.73    |
| Mental Component Summary                                         | 49 (38-58)       | 47 (36-57)                | 55 (45-59)                 | 0.05    | 44 (32-58)         | 40 (31-58)                | 51 (34-57)                 | 0.42    |
| <b>Health-related quality of life: EQ-5D-3L</b>                  |                  |                           |                            |         |                    |                           |                            |         |
| Utility score                                                    | 0.77 (0.60-0.84) | 0.76 (0.60-0.84)          | 0.79 (0.60-0.85)           | 0.30    | 0.77 (0.51-0.84)   | 0.77 (0.51-0.85)          | 0.78 (0.69-0.81)           | 0.89    |
| Visual analogue scale                                            | 75 (60-85)       | 75 (50-85)                | 75 (65-85)                 | 0.57    | 80 (50-90)         | 80 (50-90)                | 80 (75-85)                 | 0.82    |
| <b>Physical functioning</b>                                      |                  |                           |                            |         |                    |                           |                            |         |
| Functional Performance Inventory-Short Form                      | 2.1 (1.3-2.6)    | 1.9 (1.3-2.5)             | 2.2 (1.6-2.7)              | 0.24    | 2.0 (1.5-2.6)      | 2.1 (1.6-2.6)             | 1.9 (1.4-2.3)              | 0.29    |
| <b>Mental health symptoms</b>                                    |                  |                           |                            |         |                    |                           |                            |         |
| Anxiety subscale of HADS                                         | 6 (2-10)         | 6 (3-10)                  | 6 (2-9)                    | 0.80    | 7 (3-10)           | 7 (3-11)                  | 6 (3-10)                   | 0.69    |
| Depression subscale of HADS                                      | 5 (1-10)         | 6 (3-11)                  | 3 (1-9)                    | 0.15    | 6 (2-9)            | 6 (2-10)                  | 5 (1-7)                    | 0.18    |
| Post-traumatic stress disorder score- IES-R                      | 0.6 (0.1-1.6)    | 0.6 (0.1-1.6)             | 0.5 (0.2-1.1)              | 0.83    | 0.8 (0.3-1.7)      | 0.7 (0.3-1.7)             | 0.8 (0.3-1.7)              | 0.78    |
| <b>In-patient healthcare utilization</b>                         |                  |                           |                            |         |                    |                           |                            |         |
| Physical rehabilitation, N (%) †                                 | 6 (5)            | 3 (4)                     | 3 (9)                      | 0.38    | 2 (2)              | 2 (2)                     | 0 (0)                      | 1.00    |
| Skilled nursing, N (%) †                                         | 4 (3)            | 3 (4)                     | 1 (3)                      | 1.00    | 2 (2)              | 2 (2)                     | 0 (0)                      | 1.00    |
| Hospital re-admission, N (%)                                     | 28 (24)          | 16 (20)                   | 12 (34)                    | 0.16    | 31 (30)            | 26 (32)                   | 5 (21)                     | 0.31    |
| No. admissions to hospital, among those with admission           | 1.0 (1.0-2.2)    | 2.0 (1.0-3.0)             | 1.0 (1.0-2.0)              | 0.07    | 1.0 (1.0-2.0)      | 1.0 (1.0-2.0)             | 2.0 (1.0-3.0)              | 0.21    |

Supplementary Table 4, cont'd

| Performance-based physical outcomes       | Placebo Group |                               |                               |             | Rosuvastatin Group |                               |                               |         |
|-------------------------------------------|---------------|-------------------------------|-------------------------------|-------------|--------------------|-------------------------------|-------------------------------|---------|
|                                           | Total<br>N=29 | Hypo-<br>inflammatory<br>N=20 | Hyper-<br>inflammatory<br>N=9 | P<br>Value‡ | Total<br>N=24      | Hypo-<br>inflammatory<br>N=17 | Hyper-<br>inflammatory<br>N=7 | P Value |
| 6-Minute walk distance, % predicted       | 72 (52-84)    | 67 (52-80)                    | 74 (60-92)                    | 0.41        | 74 (63-85)         | 75 (65-85)                    | 67 (54-78)                    | 0.48    |
| 4 m gait speed, m/s                       | 1.0 (0.8-1.2) | 1.0 (0.8-1.2)                 | 1.0 (0.8-1.1)                 | 0.57        | 1.0 (0.9-1.1)      | 1.0 (0.9-1.1)                 | 1.0 (0.8-1.2)                 | 0.88    |
| Hand Grip, Greater % predicted            | 91 (72-107)   | 93 (78-106)                   | 76 (66-111)                   | 0.37        | 86 (69-111)        | 91 (65-129)                   | 81 (69-98)                    | 0.35    |
| Muscle strength, % maximum                | 97 (93-98)    | 97 (93-100)                   | 97 (95-97)                    | 0.59        | 97 (93-100)        | 97 (93-100)                   | 98 (96-100)                   | 0.44    |
| Maximal Inspiratory Pressure, % predicted | 105 (77-127)  | 116 (77-123)                  | 92 (82-136)                   | 0.92        | 109 (78-115)       | 110 (86-115)                  | 85 (64-108)                   | 0.38    |
| FEV <sub>1</sub> % predicted              | 81 (62-98)    | 88 (67-99)                    | 68 (58-90)                    | 0.40        | 80 (72-92)         | 79 (73-90)                    | 89 (64-95)                    | 0.75    |
| FVC % predicted                           | 81 (63-96)    | 84 (70-98)                    | 63 (60-86)                    | 0.22        | 80 (70-91)         | 78 (72-91)                    | 90 (64-91)                    | 1.00    |
| <b>Cognitive function status</b>          | <b>N=76</b>   | <b>N=53</b>                   | <b>N=23</b>                   |             | <b>N=65</b>        | <b>N=48</b>                   | <b>N=17</b>                   |         |
| Executive function                        | 6 (4-6)       | 5 (4-6)                       | 6 (5-6)                       | 0.16        | 6 (5-6)            | 6 (5-6)                       | 5 (4-6)                       | 0.17    |
| Language                                  | 30 (22-38)    | 31 (25-38)                    | 27 (20-37)                    | 0.49        | 33 (23-41)         | 36 (24-43)                    | 24 (22-35)                    | 0.17    |
| Verbal reasoning and concept formation    | 11 (8-12)     | 10 (8-13)                     | 11 (9-12)                     | 0.41        | 9 (8-12)           | 10 (9-13)                     | 9 (7-10)                      | 0.03    |
| Working memory and attention              | 9 (7-11)      | 9 (8-11)                      | 10 (7-11)                     | 0.99        | 9 (8-11)           | 9 (8-11)                      | 9 (7-9)                       | 0.19    |
| Immediate memory                          | 9 (7-11)      | 8 (7-11)                      | 9 (7-11)                      | 0.47        | 9 (7-11)           | 9 (7-12)                      | 7 (5-10)                      | 0.04    |
| Delayed memory                            | 9 (7-11)      | 9 (7-11)                      | 8 (7-11)                      | 0.75        | 9 (7-11)           | 9 (7-11)                      | 8 (6-10)                      | 0.18    |

COWA, controlled oral word association; EQ-5D-3L, EuroQol- 5 dimensions- 3 levels; FEV<sub>1</sub>, forced expiratory volume first second; FVC, forced vital capacity; HADS, Hospital Anxiety and Depression Scale; ICU, intensive care unit; IES-R, Impact of Event Scale-revised; NCSE, neurobehavioral cognitive status examination; SF-36, Medical Outcomes Study Short Form 36 V.2.

\*Median values (IQR) are presented unless otherwise indicated. Higher scores are better, except for mental health outcomes.

‡Wilcoxon rank-sum test was used for continuous variables and Fisher's exact test for proportions.

\*Normed using population mean of 50 and SD of 10.

¶Includes number of patients discharged from hospital to these facilities or admitted to these facilities in the course of follow-up

**Supplementary Table 5. 6- and 12-month outcomes of patient subgroup with baseline data**

| <b>Baseline Data*</b>                                             | <b>Total population<br/>N=98</b> | <b>Hypo-inflammatory<br/>N=65</b> | <b>Hyper-inflammatory<br/>N=33</b> | <b>P‡</b> |
|-------------------------------------------------------------------|----------------------------------|-----------------------------------|------------------------------------|-----------|
| <b>Health-related quality of life: SF-36 (normalized scores)†</b> |                                  |                                   |                                    |           |
| Physical Functioning                                              | 50 (32,57)                       | 49 (31,57)                        | 53 (35,57)                         | 0.46      |
| Physical Component Summary                                        | 48 (35,56)                       | 44 (35,56)                        | 53 (37,58)                         | 0.46      |
| Mental Health                                                     | 50 (36,58)                       | 50 (36,58)                        | 51 (37,58)                         | 0.84      |
| Mental Component Summary                                          | 52 (37,58)                       | 50 (39,57)                        | 53 (35,58)                         | 0.91      |
| <b>Health-related quality of life: EQ-5D-3L</b>                   |                                  |                                   |                                    |           |
| Utility score                                                     | 0.83 (0.76,1.00)                 | 0.81 (0.71,1.00)                  | 0.83 (0.77,1.00)                   | 0.80      |
| Visual analogue scale                                             | 80 (60,90)                       | 78 (58,90)                        | 85 (70,90)                         | 0.42      |
| <b>Physical functioning</b>                                       |                                  |                                   |                                    |           |
| Functional Performance Inventory-Short Form                       | 2.4 (1.9,2.7)                    | 2.3 (1.8,2.7)                     | 2.4 (2.0,2.7)                      | 0.55      |
| <b>Six-month Data</b>                                             |                                  |                                   |                                    |           |
|                                                                   | <b>N=91</b>                      | <b>N=59</b>                       | <b>N=32</b>                        | <b>P</b>  |
| <b>Health-related quality of life: SF-36 (normalized scores)</b>  |                                  |                                   |                                    |           |
| Physical Functioning                                              | 38 (25,49)                       | 40 (25,51)                        | 36 (25,47)                         | 0.24      |
| Physical Component Summary                                        | 37 (31,48)                       | 38 (29,49)                        | 35 (31,45)                         | 0.52      |
| Mental Health                                                     | 50 (36,58)                       | 51 (33,58)                        | 50 (38,58)                         | 0.77      |
| Mental Component Summary                                          | 52 (36,58)                       | 53 (34,58)                        | 49 (39,57)                         | 0.83      |
| <b>Health-related quality of life - EQ-5D-3L</b>                  |                                  |                                   |                                    |           |
| Utility score                                                     | 0.79 (0.58,0.84)                 | 0.80 (0.52,0.84)                  | 0.78 (0.67,0.83)                   | 0.95      |
| Visual analogue scale                                             | 75 (60,84)                       | 70 (60,80)                        | 75 (50,85)                         | 0.83      |
| <b>Functional performance</b>                                     |                                  |                                   |                                    |           |
| FPI                                                               | 2.0 (1.5,2.5)                    | 2.0 (1.6,2.6)                     | 1.9 (1.3,2.5)                      | 0.29      |
| <b>Twelve-month Data</b>                                          |                                  |                                   |                                    |           |
|                                                                   | <b>N=83</b>                      | <b>N=56</b>                       | <b>N=27</b>                        | <b>P</b>  |
| <b>Health-related quality of life: SF-36 (normalized scores)</b>  |                                  |                                   |                                    |           |
| Physical Functioning                                              | 39 (28,53)                       | 40 (28,54)                        | 38 (27,52)                         | 0.71      |
| Physical Component Summary                                        | 40 (30,53)                       | 40 (30,55)                        | 39 (29,47)                         | 0.30      |
| Mental Health                                                     | 50 (33,56)                       | 46 (31,58)                        | 53 (47,56)                         | 0.20      |
| Mental Component Summary                                          | 50 (36,58)                       | 47 (31,58)                        | 55 (46,57)                         | 0.16      |
| <b>Health-related quality of life - EQ-5D-3L</b>                  |                                  |                                   |                                    |           |
| Utility score                                                     | 0.79 (0.59,0.86)                 | 0.79 (0.53,1.00)                  | 0.78 (0.71,0.84)                   | 0.94      |
| Visual analogue scale                                             | 75 (60,85)                       | 75 (50,88)                        | 75 (70,85)                         | 0.79      |
| <b>Functional performance</b>                                     |                                  |                                   |                                    |           |
| FPI                                                               | 2.2 (1.6,2.6)                    | 2.2 (1.6,2.6)                     | 2.2 (1.5,2.7)                      | 0.85      |

EQ-5D-3L, EuroQol- 5 dimensions- 3 levels; SF-36, Medical Outcomes Study Short Form 36 V.2.

\*Data represent the patients' scores prior to hospitalization based on retrospective assessment.

‡Wilcoxon rank-sum test was used for continuous variables and Fisher's exact test for proportions.

†Explanation of scoring: SF-36 physical function and mental health normalized scores (mean=50; SD =10; range: 0–100; higher score is better); SF-36 physical and mental health summary normalized scores (mean=50; SD=10; higher score is better); EQ-5D utility score (range: –0.11 to 1.0; higher score is better) and visual analogue scale score (range: 0–100; higher score is better); FPI-Short Form overall score and subscale scores (for each, range: 0–3; higher score is better).



**Supplementary Table 6. Comparison of changes over 6 and 12 months compared to baseline for subset of patients with baseline data**

| Variable                                                           | Change from baseline to 6 months |                           |         | Change from baseline to 12 months |                           |         | Change from 6 to 12 months |                           |          |
|--------------------------------------------------------------------|----------------------------------|---------------------------|---------|-----------------------------------|---------------------------|---------|----------------------------|---------------------------|----------|
|                                                                    | Hypo-inflammatory (N=59)         | Hyper-inflammatory (N=32) | P value | Hypo-inflammatory (N=56)          | Hyper-inflammatory (N=27) | P value | Hypo-inflammatory (N=55)   | Hyper-inflammatory (N=27) | P value‡ |
| <b>Health-related quality of life - SF-36 (normalized scores)*</b> |                                  |                           |         |                                   |                           |         |                            |                           |          |
| Physical Functioning                                               | -2 (-11 ,0)                      | -8 (-15,-3)               | 0.05    | -3 (-8,2)                         | -4 (-13,0)                | 0.31    | 0 (-2,6)                   | 4 (0,6)                   | 0.08     |
| Physical Component Summary                                         | -4 (-14,1)                       | -7 (-17,-0)               | 0.20    | -3 (-9,2)                         | -8 (-18,-0.7)             | 0.08    | 2 (-3,7)                   | 2 (-4,7)                  | 0.85     |
| Mental Health Component Summary                                    | 0.0 (-6,6)                       | 0.0 (-4,6)                | 0.55    | -3 (-11,3)                        | 3 (-3,11)                 | <0.01   | 0 (-8,3)                   | 0 (-1,6)                  | 0.10     |
|                                                                    | -0.8 (-8,4.9)                    | -0.5 (-7,5)               | 0.69    | -1 (-11,3)                        | 3 (-1,15)                 | 0.01    | -0.9 (-7,4)                | 3 (-2,11)                 | 0.05     |
| <b>Health-related quality of life - EQ-5D-3L</b>                   |                                  |                           |         |                                   |                           |         |                            |                           |          |
| Visual analogue scale                                              | -5 (-15,5)                       | -5 (-19,6)                | 0.78    | 0.0 (-20,10)                      | -5.0 (-15,10)             | 1.00    | 2.5 (-6,11)                | 2.0 (-8,11)               | 0.89     |
| Utility score                                                      | -0.1 (-0.2,0.0)                  | 0.0 (-0.2,0.0)            | 0.30    | 0.0 (-0.2,0.0)                    | 0.0 (-0.2,0.1)            | 0.43    | 0.0 (-0.1,0.2)             | 0.0 (0.0,0.1)             | 0.98     |
| <b>Functional Performance</b>                                      |                                  |                           |         |                                   |                           |         |                            |                           |          |
| functional Performance Inventory-Short Form                        | -0.1 (-0.3,0.1)                  | -0.3 (-0.7,0.0)           | 0.04    | -0.1 (-0.4,0.1)                   | 0.0 (-0.5,0.2)            | 0.82    | 0.0 (-0.2,0.3)             | 0.1 (0.0,0.4)             | 0.05     |

EQ-5D-3L, EuroQol- 5 dimensions- 3 levels; FPI; SF-36, Medical Outcomes Study Short Form 36 V.2.

‡Wilcoxon rank-sum test was used for comparisons

\*Explanation of scoring: SF-36 physical function and mental health normalized scores (mean=50; SD =10; range: 0–100; higher score is better); SF-36 physical and mental health summary normalized scores (mean=50; SD=10; higher score is better); EQ-5D utility score (range: –0.11 to 1.0; higher score is better) and visual analogue scale score (range: 0–100; higher score is better); FPI-Short Form overall score and subscale scores (for each, range: 0–3; higher score is better).
